# Supplementary material
Source: PubMed Central journal article supplement (PMC7068674)
Supplement: jamaoncol-6-e196828-s003.pdf [file jamaoncol-6-e196828-s003.pdf]

## Data Sharing Statement

Okamoto. Comparison of Carboplatin Plus Pemetrexed Followed by Maintenance Pemetrexed With Docetaxel Monotherapy in Elderly Patients With Advanced Nonsquamous Non-Small Cell Lung Cancer. *JAMA Oncol*. Published March 12, 2020. 10.1001/jamaoncol.2019.6828

### Data

**Data available:** Yes

**Data types:** Deidentified participant data

**How to access data:** [okamotoi@kokyu.med.kyushu-u.ac.jp](mailto:okamotoi@kokyu.med.kyushu-u.ac.jp)

**When available:** With publication

### Supporting Documents

**Document types:** None

### Additional Information

**Who can access the data:** researchers whose proposed use of the data has been approved

**Types of analyses:** for a specified purpose

**Mechanisms of data availability:** after approval of a proposal

**Any additional restrictions:** Individual participant data that underlie the results reported in this article, after deidentification will be shared if investigators whose proposed use of the data has been approved by the investigators from JCOG Lung Cancer Study Group and WJOG (West Japan Oncology Group) identified for this purpose.
